# Supplementary material for: Constraints and potentials of future irrigation water availability on agricultural production under climate change
Source: HighWire-hosted journal article supplement (doi:10.1073/pnas.1222474110), 2013-12-16
Supplement: sapp.pdf [file sapp.pdf]

This is login.htm from the docs subdirectory. Review
http://www.oclc.org/us/en/support/documentation/ezproxy/url/admin/
for information on how to create an administrative user account and
www.oclc.org/us/en/support/documentation/ezproxy/usr/
for information on user authentication options.

---


Please enter your username:   
Please enter your password:   
